# The Journal of Neuropsychiatry and Clinical Neurosciences

Official Journal of the American Neuropsychiatric Association

## Editorial Board

The *Journal of Neuropsychiatry and Clinical Neurosciences* (ISSN 0895-0172), is published quarterly by the American Psychiatric Association (APA), 800 Maine Avenue SW, Suite 900, Washington, DC 20024. Copyright © 2022 American Psychiatric Association. The *Journal of Neuropsychiatry and Clinical Neurosciences* is protected by copyright and may not be reproduced in any manner without written permission. The *Journal* is abstracted/indexed in *Chemical Abstracts*, *Current Contents/Clinical Medicine*®, *EMBASE/Excerpta Medica*, *Index Medicus/MEDLINE/MEDLARS*, *PsycINFO*, *Psychological Abstracts*, *Research Alert*®, and *Sci Search*®. It is available through University Microfilms, Inc., 300 North Zeeb Road, Ann Arbor, MI 48106, in microform, electronic, or paper format.

Manuscript submissions should no longer be sent by mail. Please visit <http://mc.manuscriptcentral.com> to upload a paper online.

U.S. individual subscriptions are \$323 per year for 4 issues (\$258 for APA members); international subscriptions are \$486 per year (\$389 for APA members); online only subscriptions start at \$289 per year. Institutional subscriptions are tier priced. For institutional site license information and pricing, please email us at [institutions@psych.org](mailto:institutions@psych.org), call (800) 368-5777 or visit [www.appi.org/institutions](http://www.appi.org/institutions).

Advertising inquiries may be directed to Tim Wolfinger at PMI, 30 East 33rd St., New York, NY 10016; (212) 904-0379; [twolfinger@pminy.com](mailto:twolfinger@pminy.com).

APA is not responsible for statements made in this publication by contributors or advertisers. Unless stated, material in the *Journal of Neuropsychiatry and Clinical Neurosciences* does not reflect the endorsement, official attitude, or position of APA or the American Neuropsychiatric Association.

Periodicals postage paid at Washington, DC, and additional mailing offices. POSTMASTER: Send address changes to *Journal of Neuropsychiatry and Clinical Neurosciences*, 800 Maine Avenue SW, Suite 900, Washington, DC 20024.

### Editor

David B. Arciniegas, M.D.

### Deputy Editor

C. Alan Anderson, M.D.

### Consulting Editors

C. Edward Coffey, M.D.  
Thomas W. McAllister, M.D.  
Fred Ovsiew, M.D.  
David A. Silbersweig, M.D.  
Jonathan M. Silver, M.D.

### Associate Editors

Sheldon Benjamin, M.D.  
Deborah Black, M.D., Ph.D.  
Kevin J. Black, M.D.  
John J. Campbell, M.D.  
Miles Cunningham, M.D.  
Kirk Daffner, M.D.  
Christopher M. Filley, M.D.  
Richard B. Ferrell, M.D.  
Laura A. Flashman, Ph.D.  
Yonas E. Geda, M.D.  
W. Curt LaFrance, M.D.  
Edward C. Lauterbach, M.D.  
Mario Mendez, M.D., Ph.D.  
Charles Nemeroff, M.D., Ph.D.  
Robert G. Robinson, M.D.  
Jay Salpekar, M.D.  
Jeremy Schmahmann, M.D.  
Kaloyan S. Tanev, M.D.  
Paula T. Trzepacz, M.D.  
Valerie Voon, M.D., Ph.D.  
Hal S. Wortzel, M.D.

### Editor Emeritus

Stuart C. Yudofsky, M.D.

### ANPA Abstract Editor

Omar Ghaffar, M.D., M.Sc.

### Book Review Editor

Michael Schrift, D.O., M.A.

### Neuropsychiatry Classics Editor

Margo Lauterbach, M.D.

### Windows to the Brain Editor

Robin A. Hurley, M.D.

### American Psychiatric Association Publishing

John McDuffie

*Publisher*

Michael D. Roy

*Editorial Director, Journals*

Demarie Jackson

*Managing Editor*

Susan Westrate

*Production Manager, Journals*

Heidi Koch-Bubel

*Editorial Support Services Manager*

Linda LaCour

*Editorial Assistant*

Megan Conley

*Editorial Assistant/Permissions*

*Coordinator*

Patrick Hansard

*Director of Marketing and Sales*

AMERICAN  
PSYCHIATRIC  
ASSOCIATION  
PUBLISHING

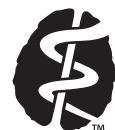

Please visit the Journal's website at [neuro.psychiatryonline.org](http://neuro.psychiatryonline.org)
