SUMMER 2022 | VOLUME 34 | NUMBER 3

The Journal of  
**Neuropsychiatry**  
and Clinical Neurosciences

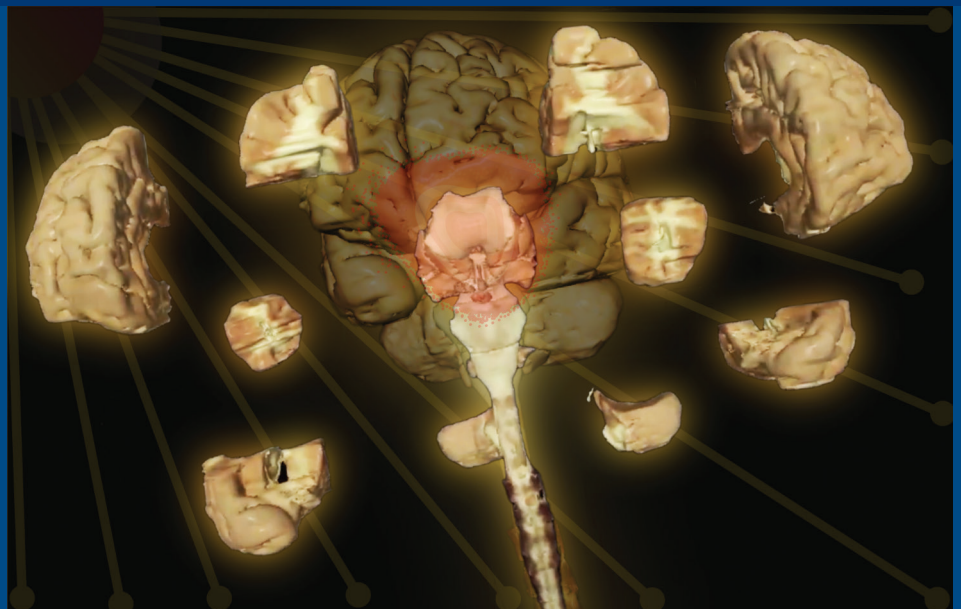

Central Executive Network and Executive Function in  
Patients With Alzheimer's Disease and Healthy Individuals:  
Meta-Analysis of Structural and Functional MRI

A Double-Blind Placebo-Controlled, Randomized Trial of  
Divalproex Sodium for Posttraumatic Irritability Greater Than  
1 Year After Mild to Moderate Traumatic Brain Injury

Predicting New-Onset Psychiatric Disorders Throughout  
the COVID-19 Pandemic: A Machine Learning Approach

Role of White Matter Microstructure in Impulsive Behavior

2022 American Neuropsychiatric Association  
Annual Meeting Abstracts

Official Journal of the American Neuropsychiatric Association  
[neuro.psychiatryonline.org](http://neuro.psychiatryonline.org)
